# Supplementary material for: TRAIL and Ceruloplasmin Inverse Correlation as a Representative Crosstalk between Inflammation and Oxidative Stress
Source: Hindawi journal article supplement (doi:10.1155/2018/9629537), 2018-07-26
Supplement: f1 [file 9629537.f1.pdf]

Supplementary Figure 1

A

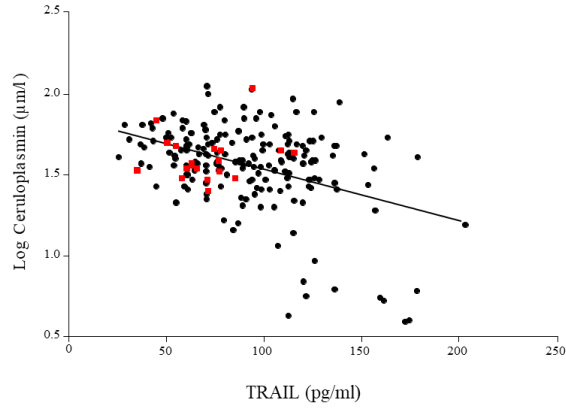

B

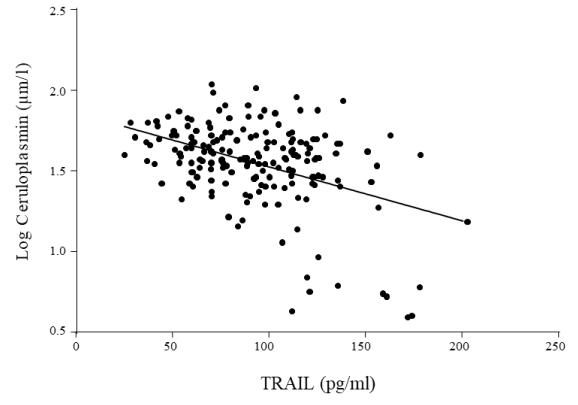

**Supplementary Table 1. Multiple regression analysis of the association between TRAIL and ceruloplasmin in subsamples stratified according to Hs-CRP median value**

| Hs.CRP levels                             | <i>B</i> | <i>Standard error</i> | $\beta$                 | <i>Contribute to outcome variance</i> | $R^{2\text{\$}}$ |
|-------------------------------------------|----------|-----------------------|-------------------------|---------------------------------------|------------------|
| <b>LOW (<math>\leq 5.1</math>nmol/l)</b>  | -0.001   | 0.001                 | -0.213<br>(0.085)       | 0.035 <sup>#</sup>                    | 0.047            |
| <b>HIGH (<math>&gt; 5.1</math>nmol/l)</b> | -0.004   | 0.001                 | -0.443<br>( $< 0.001$ ) | 0.140 <sup>#</sup>                    | 0.316            |

Multiple regression models include, age, gender, hypertension, diabetes and smoking status; B= unstandardized regression coefficient;  $\beta$ = standardized regression coefficient; # The squared semi-partial correlation coefficient accounts for the proportion of variance in the dependent variable that is explained by the covariate; § referred to the overall model
